# Supplementary material for: Wealth-driven disparities in the social cost of carbon across Chinese provinces
Source: Research Square preprint supplement (doi:10.21203/rs.3.rs-7901363/v1), 2025-12-11
Supplement: Supplementary file 1 [file ca46466795d61cb350ebd019.docx]

**Appendix A**

| **Table (a) Equivalent scale of the value of ecosystem service functions per unit area (1994US$ha-1yr-1)** | | | | | | | | | | |
| --- | --- | --- | --- | --- | --- | --- | --- | --- | --- | --- |
| **Value of annual ecosystem services** | **Open ocean** | **Coastal** | **Forest** | **Grass** | **Mangroves** | **Swamps/**  **Floodplains** | **Lakes/**  **Rivers** | **Ice/**  **Rock** | **Cropland** | **Urban** |
| Food production | 15 | 93 | 43 | 67 | 466 | 47 | 41 | **—** | 54 | **—** |
| Raw materials | **—** | 4 | 138 | **—** | 162 | 49 | **—** | **—** | **—** | **—** |
| Water supply | **—** | **—** | 3 | **—** | **—** | 7600 | 2117 | **—** | **—** | **—** |
| Gas regulation | 38 | **—** | **—** | 7 | **—** | 265 | **—** | **—** | **—** | **—** |
| Climate regulation | **—** | **—** | 141 | **—** | **—** |  | **—** | **—** | **—** | **—** |
| Disturbance regulation | **—** | 88 | 2 | **—** | 1839 | 7240 | **—** | **—** | **—** | **—** |
| Water regulation | **—** | **—** | 2 | 3 | **—** | 30 | 5445 | **—** | **—** | **—** |
| Erosion control and sediment retention | **—** | **—** | 96 | 29 | **—** | **—** | **—** | **—** | **—** | **—** |
| Soil formation | **—** | **—** | 10 | 1 | **—** | **—** | **—** | **—** | **—** | **—** |
| Nutrient cycling | 118 | 3677 | 361 | **—** | **—** | **—** | **—** | **—** | **—** | **—** |
| Waste treatment | **—** | **—** | 87 | 87 | 6696 | 1659 | 665 |  |  | **—** |
| Pollination | **—** | **—** | **—** | 25 | **—** | **—** | **—** | **—** | 14 | **—** |
| Biological control | 5 | 38 | 2 | 23 | **—** | **—** | **—** | **—** | 24 | **—** |
| Refugia | **—** | 8 | **—** | **—** | 169 | 439 | **—** | **—** | **—** | **—** |
| Genetic resources | **—** | **—** | 16 | **—** | **—** | **—** | **—** | **—** | **—** | **—** |
| Recreation | **—** | 82 | 66 | 2 | 658 | 491 | 230 | **—** | **—** | **—** |
| Cultural | 76 | 62 | 2 | **—** | **—** | 1761 | **—** | **—** | **—** | **—** |

**Appendix B**

Provincial carbon emissions comprise two components. The first includes CO₂ emissions from fossil fuel combustion, covering transportation, construction, industrial processes, and waste treatment. The second consists of CO₂ emissions from agriculture, forestry, and other land-use changes. Data for the period 1995–2020 were obtained from the *China Energy Statistical Yearbook*, *China Industrial Statistical Yearbook*, *China Environmental Statistical Yearbook*, *China Agricultural Statistical Yearbook*, *China Animal Husbandry Yearbook*, *China Forestry and Grassland Statistical Yearbook* (all 1996–2021 editions), and relevant provincial statistical yearbooks. CO₂ emissions from fossil fuel combustion were estimated based on the consumption of nine energy types: coking coal, coke, crude oil, gasoline, kerosene, diesel, fuel oil, liquefied natural gas, and natural gas. Emission factors for each energy type, listed in Table (b), were sourced from the China Stock Market & Accounting Research Database (CSMAR). The calculation follows the methodology provided in the *2006 IPCC Guidelines for National Greenhouse Gas Inventories*, using the formula below:

(1)

Where *C* denotes the total estimated carbon dioxide emissions; *i* indexes the nine energy types considered; *E* represents the total consumption of each energy type; *NCV* is the average net calorific value; *CEF* is the carbon emission factor, defined as carbon emissions per unit of energy; and *COP* indicates the carbon oxidation rate.

| **Table (b) The parameters for energy emission calculation** | | | |
| --- | --- | --- | --- |
| **Energy name** | ***NCV*（KJ/Kg or KJ/m3）** | ***CEF*（kgCO2/kg or kgCO2/m3）** | ***COP*（%）** |
| Coking coal | C20934 | 1.9027 | 0.94 |
| Coke | 28470 | 2.8639 | 0.93 |
| Crude oil | 41868 | 3.024 | 0.98 |
| Gasoline | 43124 | 2.9287 | 0.98 |
| Kerosene | 43124 | 3.0372 | 0.98 |
| Diesel | 42705 | 3.0998 | 0.98 |
| Fuel oil | 41816 | 3.1705 | 0.98 |
| Liquefied natural gas | 50242 | 3.1052 | 0.98 |
| Natural gas | 38979 | 2.1649 | 0.99 |

Provincial carbon emissions from 2025 to 2030 were projected using a grey prediction model. Based on historical emission data for each province from 1990 to 2022, a grey GM(1,1) model for CO₂ emissions was established, with the original data sequence expressed as follows:

(2)

where *n* represents the year. A first-order accumulation was performed to obtain Equation (3)：

(3)

(4)

A differential equation ，as established using Equation (4), and the parameter vector was solved to obtain ，and

(5)

Substituting into the differential equation and performing a first-order inverse accumulation operation yields the predicted values of the original data sequence.

(6)

The posterior error ratio is the ratio of the mean square error to the variance of the original data：

(7)

Given that the grey prediction model is unsuitable for long-term time series estimation and considering China’s commitment to peak carbon emissions by 2030, provincial carbon emissions after 2030 are projected using an annual emission reduction rate. According to He et al. (2022), China must achieve a stable emissions peak before 2030 and approach net-zero CO₂ emissions by around 2050 to meet the carbon neutrality goal by 2060. Under the Nationally Determined Contribution (NDC) scenario—consistent with China’s 2015 climate pledges and subsequent action plans—the annual emission reduction rate after 2030 is estimated at approximately 1%. Therefore, this study applies a 1% annual reduction rate for post-2030 carbon emission projections.
